# Supplementary material for: Effect of bamboo charcoal amendment on an AnMBR in the aspect of anaerobic habitat and membrane fouling
Source: Royal Society of Chemistry journal article supplement (doi:10.1039/c8ew00528a), 2018-01-01
Supplement: c8ew00528a1.pdf [file c8ew00528a1.pdf]

# Supplementary information

For

## **Effect of bamboo charcoal amendment on an AnMBR in aspect of anaerobic habitat and membrane fouling**

Lu Ye<sup>a</sup>, Tian Xia<sup>a</sup>, Hui Chen<sup>a</sup>, Liangliang Ling<sup>a</sup>, Xiangyang Xu<sup>a,b,c</sup>, Pedro J.J. Alvarez<sup>d</sup>, Liang Zhu<sup>a,b,c,\*</sup>

*<sup>a</sup>Institute of Environment Pollution Control and Treatment, Zhejiang University, Hangzhou 310058, China*

*<sup>b</sup>Zhejiang Province Key Laboratory for Water Pollution Control and Environmental Safety, Hangzhou 310058, China*

*<sup>c</sup>Zhejiang Provincial Engineering Laboratory of Water Pollution Control, 388 Yuhangtang Road, Hangzhou 310058, China*

*<sup>d</sup>Department of Civil and Environmental Engineering, Rice University, Houston, TX 77005, USA*

\*Corresponding author: Liang Zhu

Address: Department of Environmental Engineering, Zhejiang University, No. 866 Yuhangtang Road, Hangzhou 310058, PR China.

Tel.: +86-571-88982343; Fax: +86-571 88982343

E-mail address: felix79cn@zju.edu.cn.

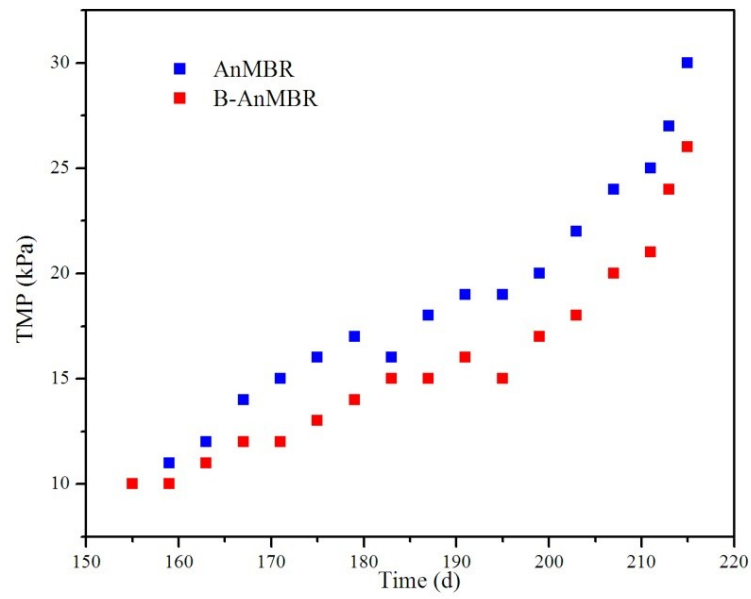

Fig. S1 The evolution of the TMP in the AnMBR and B-AnMBR

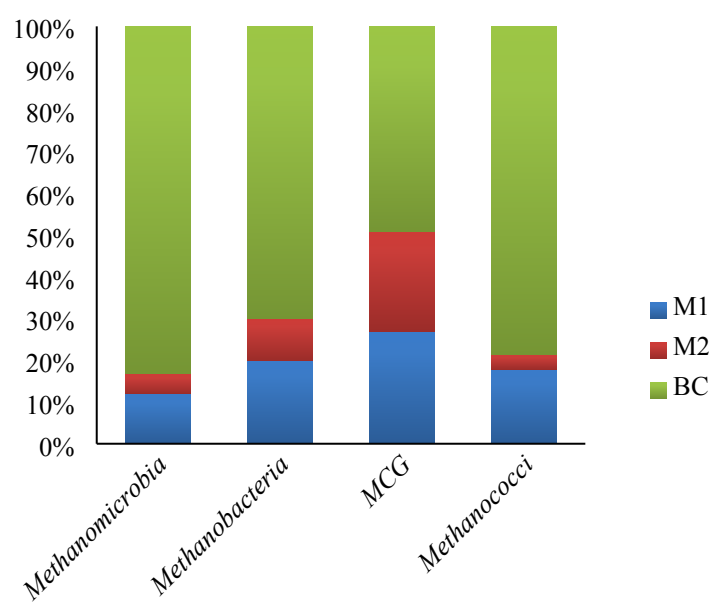

Fig. S2 Relative abundance of archaeal community at the class level

Table S1 The fluorescence intensity of protein,  $\alpha$ -polysaccharide and  $\beta$ -polysaccharide in different samples

| Sample           | Protein | $\alpha$ -polysaccharide | $\beta$ -polysaccharide |
|------------------|---------|--------------------------|-------------------------|
| AnMBR membrane   | 15.479  | 10.349                   | 19.906                  |
| B-AnMBR membrane | 6.075   | 4.283                    | 6.734                   |
| Bamboo charcoal  | 13.14   | 5.215                    | 5.877                   |
